# Supplementary material for: Epicardial Injections of Allogenic Human Induced Pluripotent Stem Cells-derived Cardiomyocytes for Severe Chronic Ischemic Heart Failure: The HEAL-CHF Trial
Source: Research Square preprint supplement (doi:10.21203/rs.3.rs-7414031/v1), 2025-09-23
Supplement: Supplementary file 1 [file 3a3767ba3dbfe100266b42b0.pdf]

## Clinical Trial Protocol

### Epicardial Injection of Allogeneic Human Pluripotent Stem Cell-derived Cardiomyocytes to Treat Severe Chronic Heart Failure

|                        |                                                                                                                       |
|------------------------|-----------------------------------------------------------------------------------------------------------------------|
| Sponsor                | Help Therapeutics Co., Ltd.                                                                                           |
| Principal investigator | Dongjin Wang                                                                                                          |
| Department             | Department of Cardio-Thoracic Surgery, Nanjing Drum Tower Hospital Affiliated to Medical School of Nanjing University |
| Contact                | Dongjin Wang                                                                                                          |
| Phone number           | ██████████                                                                                                            |
| Duration               | 2021.1-2023.1                                                                                                         |
| Version                | 6.1 (Final)                                                                                                           |
| Effective Date         | 2021.08.01                                                                                                            |

Protocol version 6.1 was the sole version implemented throughout the trial, serving as the definitive operative version for all study activities, including screening, enrollment, and intervention.

**Confidentiality**

This document is the property of Help Therapeutics.

It is intended for restricted use only and may not be passed on, reproduced, published, or used without express permission of Help Therapeutics.

All rights reserved.

## TABLE OF CONTENTS

|                                                                       |    |
|-----------------------------------------------------------------------|----|
| TABLE OF CONTENTS .....                                               | 3  |
| PROTOCOL SYNOPSIS.....                                                | 5  |
| LIST OF ABBREVIATIONS .....                                           | 8  |
| 1 INTRODUCTION.....                                                   | 10 |
| 1.1 Background .....                                                  | 10 |
| 1.1.1 The mechanisms of cardiovascular regeneration .....             | 10 |
| 1.1.2 Cardiovascular Regeneration Therapeutics .....                  | 10 |
| 1.1.3 Preclinical and Clinical Research in Cardiac Regeneration ..... | 11 |
| 1.2 Study Rationale .....                                             | 14 |
| 2 OBJECTIVES AND ENDPOINTS.....                                       | 15 |
| 2.1 Study Objective .....                                             | 15 |
| 2.2 Study Endpoints .....                                             | 15 |
| 2.2.1 Primary endpoints .....                                         | 15 |
| 2.2.2 Secondary endpoints.....                                        | 15 |
| 3 STUDY DESIGN.....                                                   | 16 |
| 3.1 Inclusion Criteria .....                                          | 17 |
| 3.2 Exclusion Criteria .....                                          | 17 |
| 4 STUDY TREATMENT.....                                                | 18 |
| 4.1 Treatment and dosage.....                                         | 18 |
| 4.1.1 Treatment.....                                                  | 18 |
| 4.1.2 Dosage form and dosage.....                                     | 19 |
| 5 STUDY PROCESS.....                                                  | 19 |
| 5.1 Study Flowchart .....                                             | 19 |
| 5.2 VISIT AND ASSESSMENT SCHEDULE .....                               | 19 |
| 6 STATISTICAL CONSIDERATIONS.....                                     | 22 |
| 6.1 Study Design .....                                                | 22 |
| 6.2 Study Duration .....                                              | 22 |
| 6.3 Sample Size Determination .....                                   | 22 |
| 6.4 Randomization and blinding.....                                   | 22 |
| 6.5 Statistical Analyses .....                                        | 22 |
| 6.5.1 Primary endpoint analysis .....                                 | 22 |
| 6.5.2 Secondary endpoint analysis .....                               | 23 |

|                                                                                                             |    |
|-------------------------------------------------------------------------------------------------------------|----|
| 6.5.3 Safety Analyses .....                                                                                 | 23 |
| 7 INFORMED CONSENT.....                                                                                     | 23 |
| 8 RISKS AND CONTROLS .....                                                                                  | 24 |
| 8.1 Tumorigenicity Risk and Control Measures for Allogeneic Human-Derived Regenerative Cardiomyocytes ..... | 24 |
| 8.2 Graft-Versus-Host Disease Risk and Control .....                                                        | 24 |
| 8.2.1 Acute GvHD.....                                                                                       | 24 |
| 8.2.2 Chronic GvHD.....                                                                                     | 25 |
| 8.2.3 Treatment of GvHD .....                                                                               | 25 |
| 8.3 Immunosuppressive Medication Adverse Effects and Mitigation Strategies.....                             | 26 |
| 8.4 Post-Transplant Ventricular Arrhythmias Risks and Control.....                                          | 27 |
| 8.5 Donor Safety Risks and Control.....                                                                     | 28 |
| 9 RESEARCH ORGANIZATION STRUCTURE.....                                                                      | 28 |
| 9.1 Sponsor and Responsibilities .....                                                                      | 28 |
| 9.2 Clinical Research Coordinator .....                                                                     | 29 |
| 9.3 Investigator and Responsibilities .....                                                                 | 29 |
| 9.4 Informed Consent Process .....                                                                          | 30 |
| 10 REFERENCES.....                                                                                          | 31 |

## PROTOCOL SYNOPSIS

|                               |                                                                                                                                                                                                                                                                                                                                                                                                                                                                                                                                                                                                                                                           |
|-------------------------------|-----------------------------------------------------------------------------------------------------------------------------------------------------------------------------------------------------------------------------------------------------------------------------------------------------------------------------------------------------------------------------------------------------------------------------------------------------------------------------------------------------------------------------------------------------------------------------------------------------------------------------------------------------------|
| <b>Title</b>                  | Epicardial Injection of Allogeneic Human Pluripotent Stem Cell-derived Cardiomyocytes to Treat Severe Chronic Heart Failure                                                                                                                                                                                                                                                                                                                                                                                                                                                                                                                               |
| <b>Sponsor</b>                | HELP Therapeutics Co., Ltd. Nanjing, China                                                                                                                                                                                                                                                                                                                                                                                                                                                                                                                                                                                                                |
| <b>Objective</b>              | To evaluate the safety and efficacy of intramyocardial injection of Allogeneic Human Induced Pluripotent Stem Cells-derived Cardiomyocytes in patients with severe chronic ischemic heart failure with coronary artery bypass grafting indications.                                                                                                                                                                                                                                                                                                                                                                                                       |
| <b>Principal Investigator</b> | Dongjin Wang                                                                                                                                                                                                                                                                                                                                                                                                                                                                                                                                                                                                                                              |
| <b>Institution</b>            | Nanjing Drum Tower Hospital                                                                                                                                                                                                                                                                                                                                                                                                                                                                                                                                                                                                                               |
| <b>Indication</b>             | Severe Chronic Ischemic Heart Failure                                                                                                                                                                                                                                                                                                                                                                                                                                                                                                                                                                                                                     |
| <b>Study Phase</b>            | Exploratory                                                                                                                                                                                                                                                                                                                                                                                                                                                                                                                                                                                                                                               |
| <b>Study Design</b>           | single-center, open-label, randomized controlled trial                                                                                                                                                                                                                                                                                                                                                                                                                                                                                                                                                                                                    |
| <b>Study Population</b>       | Patients with severe chronic ischemic heart failure with definitive coronary artery bypass grafting (CABG) indications.                                                                                                                                                                                                                                                                                                                                                                                                                                                                                                                                   |
| <b>Sample Size</b>            | 20                                                                                                                                                                                                                                                                                                                                                                                                                                                                                                                                                                                                                                                        |
| <b>Treatment Groups</b>       | <p>This exploratory trial will enroll 20 patients with severe chronic ischemic heart failure who meet the inclusion/exclusion criteria. After providing informed consent, subjects will be randomized into two groups:</p> <p>Control Group (n=10): Patients will undergo standardized coronary artery bypass grafting (CABG) alone.</p> <p>Cell Therapy Group (n=10): Patients will receive CABG followed by intramyocardial cell therapy (<math>2 \times 10^8</math> cells). Following the completion of graft anastomoses, human-derived regenerative cardiomyocytes will be administered via 10 targeted injections into the peri-infarct region.</p> |
| <b>Follow-Up Schedule</b>     | Patients will undergo three scheduled visits at postoperative intervals of 1, 6, and 12 months. During each visit, relevant clinical documentation and laboratory test results will be recorded. Following the completion of the study follow-up period, subjects will transition into post-study safety surveillance, which will continue until either mortality or loss to follow-up occurs.                                                                                                                                                                                                                                                            |

|                                              |                                                                                                                                                                                                                                                                                                                                                                                                                                                                                                                                                                                                                                                                                                                                                                                                                                                                                                                                                                                                                                                                                                                                                                                                                                                                                                                                                                                                                                                                                                                                                                                                                                                                 |
|----------------------------------------------|-----------------------------------------------------------------------------------------------------------------------------------------------------------------------------------------------------------------------------------------------------------------------------------------------------------------------------------------------------------------------------------------------------------------------------------------------------------------------------------------------------------------------------------------------------------------------------------------------------------------------------------------------------------------------------------------------------------------------------------------------------------------------------------------------------------------------------------------------------------------------------------------------------------------------------------------------------------------------------------------------------------------------------------------------------------------------------------------------------------------------------------------------------------------------------------------------------------------------------------------------------------------------------------------------------------------------------------------------------------------------------------------------------------------------------------------------------------------------------------------------------------------------------------------------------------------------------------------------------------------------------------------------------------------|
| <b>Primary Endpoints</b>                     | <p><b>Safety:</b></p> <ol style="list-style-type: none"> <li>1. Incidence of sustained ventricular tachycardia ( 1~6 Month Post-operation) <ul style="list-style-type: none"> <li>○ Defined as the proportion of patients experiencing ventricular tachycardia lasting more than 30 seconds</li> </ul> </li> <li>2. Incidence of newly formed tumors (12 Month Post-operation) <ul style="list-style-type: none"> <li>○ By comparing chest, abdominal and pelvic CT scan and PET-CT scan</li> </ul> </li> </ol>                                                                                                                                                                                                                                                                                                                                                                                                                                                                                                                                                                                                                                                                                                                                                                                                                                                                                                                                                                                                                                                                                                                                                 |
| <b>Secondary Endpoints</b>                   | <p><b>Safety:</b></p> <ol style="list-style-type: none"> <li>1. Incidence of perioperative serious adverse events (SAEs): <ul style="list-style-type: none"> <li>○ Such as Mortality, Non-fatal myocardial infarction, Stroke, Cardiac perforation, Cardiac tamponade, etc.</li> </ul> </li> <li>2. Allogeneic immune monitoring: <ul style="list-style-type: none"> <li>○ PRA, DSA (2 week, 1, 3, 6 and 12 Month Post-operation)</li> </ul> </li> <li>3. Perioperative cardiac monitoring: (1 Month Post-operation)</li> </ol> <p><b>Efficacy:</b></p> <ol style="list-style-type: none"> <li>1. Left ventricular function assessment: <ul style="list-style-type: none"> <li>○ Echocardiography and cardiac MRI at 1, 6 and 12 months postoperatively to evaluate LVEF, LVEDV, and LVESV.</li> <li>○ PET/ECT at 6 and 12 months postoperatively to assess myocardial contractility, diastolic function, and perfusion.</li> </ul> </li> <li>2. Six-minute walk test: <ul style="list-style-type: none"> <li>○ Distance walked measured at 6 and 12 months postoperatively.</li> </ul> </li> <li>3. NYHA functional classification: <ul style="list-style-type: none"> <li>○ Assessed at 6, and 12 months postoperatively.</li> </ul> </li> <li>4. Quality of life evaluation: <ul style="list-style-type: none"> <li>○ Minnesota Living with Heart Failure Questionnaire (MLHFQ) administered at 6, and 12 months postoperatively.</li> </ul> </li> <li>5. Major adverse cardiac events (MACE) incidence: <ul style="list-style-type: none"> <li>○ Mortality; Non-fatal myocardial infarction; Heart failure-related rehospitalization</li> </ul> </li> </ol> |
| <b>Statistical Methods and Data Analyses</b> | <p>The trial results will be analyzed primarily using descriptive statistics.</p>                                                                                                                                                                                                                                                                                                                                                                                                                                                                                                                                                                                                                                                                                                                                                                                                                                                                                                                                                                                                                                                                                                                                                                                                                                                                                                                                                                                                                                                                                                                                                                               |

|                 |                                                                                                                                                                                                                                                                                                                                                                                                                                                                                                                                                                                                                                                                                                                                                        |
|-----------------|--------------------------------------------------------------------------------------------------------------------------------------------------------------------------------------------------------------------------------------------------------------------------------------------------------------------------------------------------------------------------------------------------------------------------------------------------------------------------------------------------------------------------------------------------------------------------------------------------------------------------------------------------------------------------------------------------------------------------------------------------------|
|                 | Continuous variables will be presented as mean $\pm$ standard deviation, along with median, minimum, and maximum values. 95% confidence intervals for means will be estimated using the t-distribution method. Between-group comparisons of means will be performed using Student's t-test. Categorical and ordinal data will be summarized as frequencies (percentages) and rates. 95% confidence intervals for rates will be calculated using the Miettinen method. Between-group comparisons of proportions will be conducted using Fisher's exact test. Longitudinal comparisons (e.g., PRA, DSA, 6-minute walk distance, NYHA functional class, MLHFQ scores) will be analyzed using repeated measures ANOVA to assess dynamic changes over time. |
| <b>Duration</b> | 2 years                                                                                                                                                                                                                                                                                                                                                                                                                                                                                                                                                                                                                                                                                                                                                |

## LIST OF ABBREVIATIONS

|           |                                                           |
|-----------|-----------------------------------------------------------|
| iPSC      | Induced pluripotent stem cells                            |
| HF        | Heart failure                                             |
| CABG      | Coronary artery bypass graft                              |
| ICD       | Implantable cardioverter defibrillator                    |
| LVEF      | Left ventricular ejection fraction                        |
| LVEDV     | Left ventricular end-diastolic volume                     |
| LVESV     | Left ventricular end-systolic volume                      |
| MRI       | Magnetic resonance imaging                                |
| CT        | Computed tomography                                       |
| cTnI      | Cardiac troponin I                                        |
| cTnT      | Cardiac troponin T                                        |
| CKMB      | Creatine phosphokinase-Mb                                 |
| NT-proBNP | N-terminalpro-brain natriuretic peptide                   |
| PCT       | Procalcitonin                                             |
| TSH       | Thyroid stimulating hormone                               |
| ECG       | Electrocardiogram                                         |
| NYHA      | New York Heart Association                                |
| MACE      | Major adverse cardiac events                              |
| MLHFQ     | Minnesota Quality of Life Questionnaire for Heart Failure |
| 6MWD      | 6min walking test distance                                |
| PCI       | Percutaneous coronary intervention                        |
| HLA       | Human leukocyte antigen                                   |
| PRA       | Population reactive antibody                              |
| DSA       | Anti-donor specific antibodies                            |
| CEA       | Carcinoembryonic antigen                                  |
| CA125     | Glycogen 125                                              |



|      |                                  |
|------|----------------------------------|
| AFP  | Alpha-fetoprotein                |
| ADR  | Adverse reactions                |
| AE   | Adverse events                   |
| SAE  | Serious adverse events           |
| CRF  | Case report form                 |
| DSMB | Data and Safety Monitoring Board |
| EC   | Ethics Committee                 |
| GCP  | Good Clinical Practice           |
| CI   | confidence interval              |
| ICF  | Informed Consent Form            |
| HIV  | Human immunodeficiency virus     |
| HCV  | Hepatitis C virus                |
| HBV  | Hepatitis B virus                |
| TP   | Treponema Pallidum               |

# 1 INTRODUCTION

## 1.1 Background

Heart failure (HF) is a serious condition with high rates of morbidity and mortality. HF is not an isolated condition, but rather the terminal phase of cardiovascular disease progression. Nearly all cardiac disorders—including myocardial infarction, cardiomyopathy, and hemodynamic overload—inevitably culminate in heart failure. Although therapeutic approaches such as pharmacotherapy, interventional procedures, and surgical interventions have seen continuous refinement in recent decades, they remain limited to symptom management rather than full functional restoration of cardiac performance. Consequently, the treatment of heart failure persists as one of medicine's most formidable global challenges.

Myocardial infarction, the most prevalent cardiac disorder, stands as a frequent precursor to heart failure. Mature cardiomyocytes are generally regarded as terminally differentiated cells with negligible regenerative capacity. Consequently, preserving and augmenting functionally competent myocardial cells emerges as the most rational therapeutic approach for various cardiac injuries. With advancing understanding of stem cell biology, harnessing their differentiation potential to regenerate cardiomyocytes, repair damaged myocardial tissue, and restore cardiac function has emerged as a promising novel strategy in contemporary heart failure treatment.

### 1.1.1 *The mechanisms of cardiovascular regeneration*

Traditionally, cardiac cells have been regarded as terminally differentiated and incapable of self-proliferation or repair<sup>[1-3]</sup>. Although some studies suggest the existence of cardiomyocyte turnover in adult human hearts, these findings remain unverified. Indeed, the regenerative capacity of the adult mammalian heart is profoundly limited<sup>[4]</sup>. When acute cardiac injury or chronic myocardial remodeling occurs, the substantial loss of cardiac cells far exceeds the heart's minimal intrinsic regenerative potential. This starkly contrasts with the robust cardiac regenerative abilities observed during embryonic development and in certain other species. For instance, in mammals, cardiomyocytes maintain vigorous mitotic activity throughout embryogenesis and the early postnatal period. However, this proliferative capacity rapidly diminishes thereafter, with mitotic activity becoming undetectable—lending credence to the conventional view that the adult heart consists of non-regenerative, terminally differentiated cells.

### 1.1.2 *Cardiovascular Regeneration Therapeutics*

Products in the field of cardiovascular regeneration can be categorized based on their regenerative strategies into: i) Exogenous regenerative products, which involve transplanted cells or tissues to replace damaged or dysfunctional cardiac structures; and ii) Stimulatory factors that activate endogenous regenerative mechanisms.

---

Stem cells, as the body's primordial cells, serve as the foundation for all tissues and organs. Stem cell therapy aims to repair diseased cells or reconstruct functional tissues, offering a fundamental treatment for numerous diseases. Consequently, leveraging their self-renewal and multipotent differentiation capabilities to treat heart failure has become a global research focus. Stem cells can be classified into skeletal myoblasts, bone marrow mononuclear cells, hematopoietic stem cells, mesenchymal stem cells, and pluripotent stem cells. Pluripotent stem cells possess unlimited proliferative and differentiation potential, including embryonic stem cells (ESCs) and induced pluripotent stem cells (iPSCs). ESCs, derived from the inner cell mass of blastocysts, hold significant promise in regenerative medicine. However, their application is constrained by ethical concerns, immune rejection, and limited source availability. In 2006, the Japanese scientist Yamanaka and his team<sup>[5]</sup> pioneered a breakthrough by introducing four pluripotency-associated transcription factors (Oct3/4, Sox2, c-Myc, and Klf4) into mouse embryonic fibroblasts via retroviral vectors, generating cells resembling ESCs with self-renewal and multipotent differentiation capabilities. These reprogrammed somatic cells, termed iPSCs, circumvent the ethical and immunological challenges of ESCs, providing an invaluable tool for disease modeling and drug development. With advancements in culture conditions and reprogramming efficiency, iPSCs can now be derived from various somatic cells (e.g., skin fibroblasts, peripheral blood cells) across species. They can proliferate and differentiate into diverse cell types, including cardiomyocytes<sup>[6]</sup> — representing a key exogenous regenerative product. Within cardiac regenerative medicine, exogenous products encompass in vitro-differentiated cardiac cells, cardiovascular and endothelial progenitor cells, bioengineered cardiac tissues, and electromechanically functional vascular patches. Recent research has validated numerous approaches, some even demonstrating efficacy in primate models<sup>[7–9]</sup>.

### **1.1.3      *Preclinical and Clinical Research in Cardiac Regeneration***

In pioneering studies on pluripotent stem cells, Laflamme et al.<sup>[10]</sup> successfully transplanted heat shock-treated human embryonic stem cell-derived cardiomyocytes (hESC-CMs) into the left ventricular wall of healthy athymic rats. The transplanted cells demonstrated excellent survival rates, with the majority exhibiting robust expression of myosin heavy chain (MHC). Notably, the hESC-CMs significantly induced angiogenic responses, accompanied by substantial neovascularization in the transplantation area. Echocardiographic and magnetic resonance imaging (MRI) assessments revealed ameliorated ventricular dilation four weeks post-transplantation. Subsequent research by Van Laake et al.<sup>[11]</sup> involved transplantation of hESC-CMs into myocardial infarction models using NOD SCID mice. The study documented progressive enrichment and maturation of cardiomyocytes, with MRI data indicating marked cardiac functional improvement at four weeks, though this beneficial effect diminished by three months post-transplantation. More recently, Chong et al.<sup>[8]</sup> made the groundbreaking discovery that hESC-CMs could regenerate cardiac tissue in large non-human primates. Their transplantation into infarcted monkey hearts 14 days post-myocardial infarction resulted in successful regeneration of the damaged myocardial regions. The latest findings by Zhu et al.<sup>[12]</sup> further demonstrated that transplantation of hESC-derived cardiovascular progenitor

---

cells in non-human primates led to significant enhancement of left ventricular ejection fraction within 28 days post-intervention.

Induced pluripotent stem cell (iPSC) technology offers a promising alternative by circumventing immunological rejection and ethical or religious controversies. The application of iPSCs in myocardial tissue repair and cardiac functional restoration has opened new therapeutic avenues for heart failure treatment. Miki et al.<sup>[13]</sup> engineered myocardial sheets from murine iPSCs using in vitro tissue engineering techniques and transplanted them into rats with chronic myocardial infarction. Histological analysis confirmed the survival of the transplanted myocardium at the epicardial site four weeks post-transplantation. Compared to the control group, the transplanted group exhibited significant improvements in cardiac function and attenuation of left ventricular remodeling. Higuchi et al.<sup>[14]</sup> introduced red fluorescent protein-labeled murine iPSC-derived cardiomyocytes into infarcted rat hearts. Functional assessments revealed progressive enhancement of left ventricular ejection fraction beginning three days post-transplantation. By two weeks, the engrafted cardiomyocytes expressed cardiac myosin and connexin 43 on the cardiac surface. Kawamura et al.<sup>[15]</sup> demonstrated that transplantation of human-derived regenerated cardiomyocytes into pigs with ischemic cardiomyopathy substantially improved cardiac function, mitigated left ventricular remodeling, and maintained detectable cell survival for eight weeks without teratoma formation. Recent advances in tissue engineering have further expanded therapeutic possibilities. Weinberger et al.<sup>[16]</sup> reported that iPSC-based artificial cardiac tissue transplantation restored cardiac function in guinea pigs with myocardial injury. Similarly, Gao et al.<sup>[17]</sup> found that human-derived engineered myocardial patches significantly enhanced left ventricular function, reduced infarct size, attenuated myocardial hypertrophy, and reversed infarction-associated alterations in striated muscle actin-regulated protein phosphorylation in a porcine myocardial infarction model. A landmark 2016 study published in *Nature* demonstrated that allogeneic iPSC-derived cardiomyocytes achieved robust electrical and mechanical coupling with host myocardium, successfully regenerating cardiac tissue in non-human primates.<sup>[18]</sup>

With the continuous advancement of preclinical research, clinical studies exploring stem cell-based regenerative therapies for heart failure have progressed rapidly. The first clinical trial in this field was conducted in 2002 to evaluate the potential of stem cells in preventing heart failure<sup>[19]</sup>. Assmus et al.<sup>[20]</sup> demonstrated significant improvement in left ventricular ejection fraction (LVEF) among 103 heart failure patients following intracoronary infusion of autologous bone marrow mononuclear cells. Similarly, a Phase I clinical trial involving percutaneous trans-coronary-venous delivery of autologous skeletal myoblasts showed LVEF improvements of 3-8% in 6 out of 9 treated patients<sup>[21]</sup>. The landmark SCIPIO trial revealed that transplantation of autologous c-kit<sup>+</sup> cardiac stem cells substantially enhanced left ventricular function while reducing infarct size<sup>[22]</sup>. Further supporting these findings, the PROMETHEUS randomized controlled trial demonstrated that mesenchymal stem cell therapy in ischemic heart failure patients led to improved LVEF and reduced scar tissue formation in surgical patients<sup>[23]</sup>. These clinical trials collectively underscore the promising therapeutic potential of stem cell-based approaches as a novel treatment paradigm for heart

failure. A pivotal milestone was achieved in 2015 when Prof. Menasché's team published the first human clinical trial of pluripotent stem cell-derived cardiac cells in the *European Heart Journal*<sup>[24]</sup>. Subsequent reports confirmed the therapeutic potential of hESC-derived cardiovascular progenitor cells in treating severe ischemic left ventricular dysfunction. Six patients (mean age 66.5 years, baseline LVEF 26%) exhibited marked improvement in systolic function post-transplantation, with no observed arrhythmias or tumor formation during long-term follow-up<sup>[25]</sup>.

Through systematic literature review, we have identified that stem cell therapy has been predominantly investigated for ischemic heart disease treatment. Current research efforts encompass over 100 clinical trials targeting acute myocardial infarction and more than 90 studies focusing on chronic ischemic heart failure (see Table 1 for comprehensive summary). Our analysis included 48 systematic reviews and meta-analyses<sup>[26]</sup>, all demonstrating remarkable consistency in supporting the feasibility and safety of stem cell-based interventions. These studies collectively report significant improvements in both cardiac function and clinical parameters among patients with acute myocardial infarction and chronic ischemic left ventricular dysfunction. In conclusion, cardiac regenerative therapy has been conclusively established as an effective, feasible, and safe therapeutic strategy for patients with ischemic heart disease. The substantial body of clinical evidence underscores its potential as a transformative treatment modality in cardiovascular medicine<sup>[27]</sup>.

**Table 1. Summary of Randomized Clinical Trials in Cardiovascular Regenerative Medicine**

| Disease Classification                  | Regenerative Product         | Safety Profile | Overall Efficacy |
|-----------------------------------------|------------------------------|----------------|------------------|
| Acute Myocardial Infarction<br>(n=2732) | BMMNC[28-38]                 | Safe           | Neutral          |
|                                         | BM-MSC[39]                   | Safe           | Neutral          |
|                                         | Specific BM Cells[40-42]     | Safe           | Neutral          |
|                                         | ADSC[43]                     | Safe           | Neutral          |
|                                         | CDC[44]                      | Safe           | Positive         |
| Ischemic Heart Failure<br>(n=2035)      | SM[45-48]                    | Safe           | Neutral          |
|                                         | BMMNC[49-52]                 | Safe           | Neutral          |
|                                         | BM-MSC[53, 54]               | Safe           | Positive         |
|                                         | Specific BM Cells[20, 55-60] | Safe           | Positive         |
|                                         | CSC[61]                      | Safe           | Positive         |

|                                       |                           |      |          |
|---------------------------------------|---------------------------|------|----------|
|                                       | Gene therapy[62-64]       | Safe | Neutral  |
| Refractory Angina<br>(n=353)          | BMMNC[65-68]              | Safe | Positive |
|                                       | Specific BM Cells[69-71]  | Safe | Positive |
|                                       | ADSC[72]                  | Safe | Positive |
|                                       |                           |      |          |
| Non-Ischemic Heart Failure<br>(n=166) | BMMNC[73]                 | Safe | Neutral  |
|                                       | Specific BM Cells[74, 75] | Safe | Neutral  |
|                                       | BM-MSC[76]                | Safe | Neutral  |
| Peripheral Artery Disease<br>(n=1217) | BMMNC[77]                 | Safe | Positive |
|                                       | Specific BM Cells[78, 79] | Safe | Positive |
|                                       | Gene therapy[80, 81]      | Safe | Neutral  |

## 1.2 Study Rationale

Extensive large-animal studies on post-myocardial infarction heart failure have demonstrated that direct transplantation of exogenous cardiomyocyte products can reverse left ventricular remodeling and enhance systolic function, as evidenced in numerous acute and chronic models. Pluripotent stem cell-derived cardiomyocytes show promise in delaying the progression of post-infarction heart failure, offering new therapeutic prospects. Large-animal experiments reveal that allogeneic transplantation of terminally differentiated iPSC-derived cardiomyocytes with physiological cardiac function following infarction-induced heart failure enables effective electromechanical coupling with host cardiomyocytes. This intervention has been shown to improve cardiac function in treated subjects<sup>[18]</sup>. Our research team has also validated the therapeutic efficacy of human-derived regenerative cardiomyocytes in cynomolgus monkeys. Echocardiographic and magnetic resonance imaging analyses demonstrated significant functional improvement in treated groups compared to untreated controls. Histopathological staining revealed markedly reduced infarct size and fibrosis in the intervention group. Additionally, electrocardiographic monitoring detected no malignant arrhythmic events in either the cell therapy or cell-plus-medium treatment groups during the observation period. Biochemical analyses confirmed no significant hepatic or renal dysfunction in these cohorts. While preclinical primate studies using human-derived regenerative cardiomyocyte transplantation have yielded promising results for heart failure treatment, further investigation is required to translate these findings to human clinical applications. Our team has systematically reviewed, synthesized, and developed the current experimental protocol

based on eight years of closely related clinical research (Table 1: Summary of Randomized Clinical Trials in Cardiovascular Regenerative Medicine).

Notably, in March 2019, Japan initiated the world's first clinical trial using induced pluripotent stem cells (iPSCs) for heart failure treatment. Professor Yoshiki Sawa's team at Osaka University's Department of Cardiovascular Surgery received approval from the Ministry of Health, Labour and Welfare for this groundbreaking study - marking Japan's second application of iPSC-derived cell therapy since the pioneering 2014 retinal cell trial. Preliminary experimental treatment in three cardiomyopathy patients demonstrated favorable safety profiles. This clinical investigation will primarily evaluate therapeutic efficacy through a one-year validation period. These developments provide objective scientific rationale for our current trial.

## 2 OBJECTIVES AND ENDPOINTS

### 2.1 Study Objective

To evaluate the safety and efficacy of intramyocardial injection of Allogenic Human Induced Pluripotent Stem Cells-derived Cardiomyocytes in patients with severe chronic ischemic heart failure with coronary artery bypass grafting indications.

### 2.2 Study Endpoints

#### 2.2.1 *Primary endpoints*

##### **Safety:**

1. Incidence of sustained ventricular tachycardia (1~6 Month Post-operation)
  - Defined as the proportion of patients experiencing ventricular tachycardia lasting more than 30 seconds
2. Incidence of newly formed tumors (12 Month Post-operation)
  - By comparing chest, abdominal and pelvic CT scan and PET-CT scan

#### 2.2.2 *Secondary endpoints*

##### **Efficacy:**

1. Cardiac MRI Assessment of Left Ventricular Function:
    - Comparative analysis of baseline versus postoperative measurements at 6, and 12 months, including: Infarcted size; End-diastolic lateral wall thickness; Focal septal thickness; Ejection fraction; End-diastolic volume; End-systolic volume; Stroke volume; Cardiac output; Myocardial density; End-diastolic myocardial mass
  2. Echocardiographic Evaluation of Left Ventricular Function:
    - Comparative analysis of baseline versus postoperative measurements at 6, and 12 months, including: End-diastolic septal thickness; Left ventricular end-diastolic
-

diameter; Left ventricular end-systolic diameter; Left ventricular posterior wall thickness at end-diastole; Left atrial diameter; Left ventricular ejection fraction; Mitral inflow velocity profile (E/A ratio)

3. Myocardial Perfusion Imaging (PET/ECT):

- Comparative analysis of left ventricular perfusion at preoperative, 6-month, and 12-month postoperatively

4. Six-Minute Walk Test (baseline, 6 and 12 months)

5. NYHA Functional Classification (baseline, 6 and 12 months)

6. Minnesota Living with Heart Failure Questionnaire (MLHFQ) (baseline, 6 and 12 months)

7. Incidence of Major Adverse Cardiac Events (MACE) including: Mortality; Non-fatal myocardial infarction; Heart failure rehospitalization

**Safety:**

1. Incidence of Perioperative Serious Adverse Events (SAE) Incidence: Mortality; Non-fatal myocardial infarction; stroke; cardiac perforation; cardiac tamponade, etc.

2. Alloimmune Response Monitoring (PRA, DSA): (baseline, 1, 6 and 12 months)

3. Perioperative Electrocardiographic Monitoring (Within 1 month postoperatively)

4. Laboratory Tests, including Complete blood count, Comprehensive metabolic panel; NT-proBNP; Troponin; Myocardial enzyme profile; Procalcitonin; Immunological panel (C3, C4, IgA, IgG, IgM); Coagulation profile, etc.

### 3 STUDY DESIGN

This is a single-center, open-label, randomized controlled trial involving 20 eligible subjects who meet the inclusion/exclusion criteria. Subjects will be randomly allocated in a 1:1 ratio into two groups:

- Control Group: Standard CABG treatment only
- Cell Therapy Group: CABG + cellular transplantation (dose:  $2 \times 10^8$  cells) + perioperative immunosuppressive therapy

**Postoperative Management:**

All patients will undergo rigorous perioperative monitoring (within the first postoperative month) with comprehensive contingency protocols in place.

**Follow-Up & Assessments:**

Both groups will undergo identical follow-up evaluations at 1, 6, and 12 months, including:

---



Imaging studies (as per protocol), Laboratory investigations, Functional assessments. Documentation will be maintained via case report forms (CRFs) to ensure accurate and reliable data acquisition.

### **3.1 Inclusion Criteria**

Subjects are eligible to be included in the study only if all of the following criteria apply:

1. Aged 35-75 (including 35 and 75).
2. Have signed the Informed Consent Form.
3. Patients have chronic left ventricular dysfunction.
4. Patients have NYHA Class III-IV cardiac function in spite of optimal heart failure maximally tolerated guideline-directed medical therapy.
5. Patients have indications for Coronary Artery Bypass Grafting.
6.  $20\% \leq \text{LVEF} \leq 45\%$  as determined by echocardiogram (data collected up to 6 months prior to inclusion evaluation are valid; data collected within 1 month since a myocardial infarction are invalid).
7. Weakening or absence of segmental regional wall motion as determined by standard imaging.

### **3.2 Exclusion Criteria**

1.  $\text{PRA} \geq 20\%$  or DSA-positive.
  2. Previous implantation of ICD, CRT or similar treatment.
  3. Valvular heart disease or received heart valvular disease
  4. Previous percutaneous transluminal coronary intervention (PCI)
  5. Atrial fibrillation
  6. History of sustained ventricular tachycardia or sudden cardiac death.
  7. Baseline glomerular filtration rate  $<30\text{ml/min/1.73m}^2$ .
  8. Liver dysfunction, as evidenced by enzymes (AST and ALT) greater than three times the ULN.
  9. Hematological abnormality: A hematocrit  $<25\%$  as determined by HCT, white blood cell  $<2500/\text{ul}$  or platelet values  $<100000/\text{ul}$  without another explanation.
  10. Known, serious radiographic contrast allergy, penicillin allergy, streptomycin allergy.
-

11. Coagulopathy (INR>1.3) not due to a reversible cause.
12. Contra-indication to performance of an MRI scan.
13. History of organ transplant.
14. Clinical history of malignancy within 5 years (patients with prior malignancy must be disease-free for 5 years).
15. Non-cardiac condition that limits lifespan <1 year.
16. Chronic therapy with immunosuppressant medication, such as glucocorticoids and TNF  $\alpha$  antagonist.
17. Patients' allergy to or contra-indication to immunosuppressants.
18. Serum positivity for HIV, HBV, HCV, TP.
19. Currently enrolled in other investigational therapeutic or device study.
20. Female patient who is pregnant or breast-feeding.
21. Other conditions that researchers consider not suitable to participate in this study.

## **4 STUDY TREATMENT**

### **4.1 Treatment and dosage**

#### **4.1.1 Treatment**

All enrolled subjects will undergo standardized coronary artery bypass grafting (CABG) in accordance with established clinical guidelines. For patients in the cell therapy group, the treatment protocol incorporates myocardial cell transplantation alongside the standard CABG procedure. Following completion of graft anastomoses, a total of  $2 \times 10^8$  allogeneic human regenerative cardiomyocytes are administered via epicardial injection at 10 sites surrounding the infarcted myocardial region..

Patients in the Cell therapy group were administered the following immunosuppressive regimen: intravenous immunoglobulin (2.5 g, IV) on preoperative day 1, intraoperative day (IOD), and postoperative day (POD) 3, combined with methylprednisolone (500 mg, IV) on preoperative day 1; rituximab (20 mg, IV) on IOD and POD4 to target CD20+ B-cell depletion; oral tacrolimus started preoperative day 3 and dose-adjusted to maintain trough levels within the target range of 3-5 ng/mL, as monitored by blood drug concentration until POD28, concurrently with mycophenolate mofetil (1 g, orally on preoperative day 1, increasing to 1.5 g/day until POD28) and prednisone (20 mg/day started IOD until POD28). The Control group did not receive any immunosuppressive medications. All study subjects

---

undergo intensive postoperative monitoring in the ICU with comprehensive emergency protocols implemented as needed.

#### 4.1.2 Dosage form and dosage

Cell Type: Allogeneic human regenerative cardiomyocytes

**Dosage:** A total of  $2 \times 10^8$  cells are administered via intramyocardial injection, divided equally across 10 sites (250–500  $\mu$ L per injection).

**Administration:** The procedure is performed intraoperatively following completion of graft anastomoses during CABG.

Control Group receive standardized CABG alone.

## 5 STUDY PROCESS

### 5.1 Study Flowchart

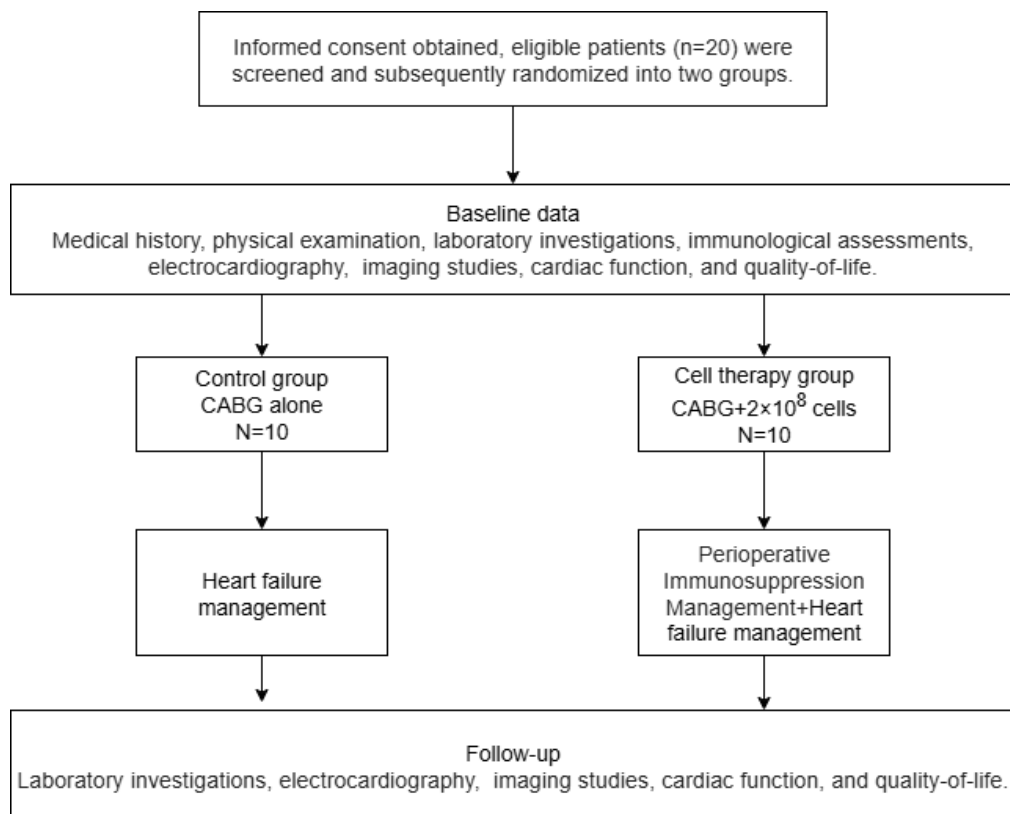

### 5.2 VISIT AND ASSESSMENT SCHEDULE

All data collection procedures for this study are detailed in Table 3

**Table 3 Visit and Assessment Schedule**

|                                          | Baseline    | Treatment period |       |     |     | Follow-up |        |         |
|------------------------------------------|-------------|------------------|-------|-----|-----|-----------|--------|---------|
| Day (D) Month (M)                        | D-14 to D-1 | D0               | D1-D7 | D14 | D21 | M1±7d     | M6±14d | M12±14d |
| Informed Consent                         | X           |                  |       |     |     |           |        |         |
| Medical History and Physical Examination | X           |                  |       |     |     | X         | X      | X       |
| Vital Signs                              | X           | X                | X     | X   | X   | X         | X      | X       |
| 12-Lead ECG                              | X           |                  | X     | X   | X   | X         | X      | X       |
| Concomitant Medications                  | X           | X                | X     | X   | X   | X         | X      | X       |
| Coronary Angiogram<br>(SYNTAX score)     | X           |                  |       |     |     |           |        |         |
| Cell transplantation documentation       |             | X                |       |     |     |           |        |         |
| Echocardiography                         | X           |                  |       |     |     |           | X      | X       |
| Cardiac MRI                              | X           |                  |       |     |     |           | X      | X       |
| PET/ECT                                  | X           |                  |       |     |     |           | X      | X       |
| CT Scan (Chest/abdomen/pelvis)           | X           |                  |       |     |     |           | X      | X       |
| 6 Minute Walk Test                       | X           |                  |       |     |     |           | X      | X       |
| NYHA classification                      | X           |                  |       |     |     |           | X      | X       |
| MLHFQ Score                              | X           |                  |       |     |     |           | X      | X       |
| Holter Monitoring<br>(24-hour ECG)       | X           |                  | X     | X   | X   | X         | X      | X       |
| Cardiac enzymes, troponin                | X           |                  | X     | X   | X   | X         | X      | X       |
| NTproBNP                                 | X           |                  | X     | X   | X   | X         | X      | X       |
| Complete Blood Count, Procalcitonin      | X           |                  |       |     |     |           |        |         |
| Blood type                               | X           |                  |       |     |     |           |        |         |
| Biochemistry                             | X           |                  | X     | X   | X   | X         | X      | X       |
| Urinalysis, Fecal Analysis               | X           |                  |       |     |     | X         | X      | X       |
| Thyroid function tests (TSH, FT3, FT4)   | X           |                  |       |     |     | X         | X      | X       |
| Tumor markers                            | X           |                  |       |     |     |           | X      | X       |
| Immunogenicity                           | X           |                  |       | X   |     | X         | X      | X       |
| Viral Serology                           | X           |                  |       | X   | X   | X         | X      | X       |
| Coagulation                              | X           |                  | X     | X   | X   |           |        |         |
| HLA Typing                               | X           |                  |       |     |     |           |        |         |
| PRA                                      | X           |                  |       |     |     | X         | X      | X       |
| DSA                                      | X           |                  |       |     |     | X         | X      | X       |
| Cytokine Panel                           | X           |                  | X     | X   |     |           |        |         |

|                   | Baseline    | Treatment period |       |     |     | Follow-up |        |         |
|-------------------|-------------|------------------|-------|-----|-----|-----------|--------|---------|
| Day (D) Month (M) | D-14 to D-1 | D0               | D1-D7 | D14 | D21 | M1±7d     | M6±14d | M12±14d |
| Adverse Events    |             | X                | X     | X   | X   | X         | X      | X       |

## **6 STATISTICAL CONSIDERATIONS**

### **6.1 Study Design**

This is a single-center, open-label, randomized controlled trial. Study objective is To evaluate the safety and efficacy of intramyocardial injection of Allogenic Human Induced Pluripotent Stem Cells-derived Cardiomyocytes in patients with severe chronic ischemic heart failure with coronary artery bypass grafting indications. The sample size for this study is 20.

### **6.2 Study Duration**

Patient enrollment is projected to require 6 months. All subjects will continue protocol-mandated follow-up through the 12-month (12M) visit as scheduled.

### **6.3 Sample Size Determination**

This is an exploratory study. The total sample size is 20, with 10 allocated to the cell therapy group and 10 to the control group

### **6.4 Randomization and blinding**

The trial employed an open-label design with single-blind outcome assessment. To mitigate evaluation bias, Assessors assessing treatment efficacy were blinded to group assignments.

Prior to trial initiation, a statistician generated 20 randomization codes using SAS PLAN procedure with 1:1 allocation. Sequentially numbered (1-20), opaque sealed envelopes containing group assignments were prepared, each bearing its corresponding identification number. Following written informed consent and successful screening, the designated envelope was opened immediately before surgery to reveal group allocation and initiate the assigned procedure. This ensured allocation concealment during screening and pre-randomization phases, preventing selection bias.

### **6.5 Statistical Analyses**

#### **6.5.1 Primary endpoint analysis**

The primary endpoints, including incidence of sustained ventricular tachycardia (1~6 Month Post-operation) and newly formed tumors (12 Month Post-operation) will be analyzed using descriptive statistics (number of observations, mean, median, standard deviation, minimum, and maximum) for continuous variables and using frequencies and percentages for categorical and ordinal variables. A final analysis will be conducted when all subjects have completed the study participation.

---

### **6.5.2 Secondary endpoint analysis**

Secondary endpoints were analyzed using descriptive statistics. The comparative assessment of treatment effects employed distinct analytical approaches based on variable characteristics. Continuous variables are presented with mean, standard deviation, median, maximum and minimum values, and range, compared using the t-test method. Categorical and ordinal data are reported as frequencies (percentages), compared using the Wilcoxon rank-sum test. A two-sided p-value of  $\leq 0.05$  was considered statistically significant for all analyses.

### **6.5.3 Safety Analyses**

Adverse events will be described using the preferred terms from the MedDRA terminology. All adverse events will be graded for severity according to the Common Terminology Criteria for Adverse Events (CTCAE), version 5.0. For Major Adverse Cardiac Events (MACE), including arrhythmias, and for other adverse events and adverse drug reactions distinct from arrhythmias, the number of events and the number of subjects experiencing these events will be determined. Adverse events assessed as Serious Adverse Events (SAEs) will be identified, and the number of such SAEs and the number of subjects experiencing SAEs will be determined. For significant events related to Coronary Artery Bypass Graft (CABG), the number of events and the number of subjects experiencing these events will be determined. Adverse events occurring during or within a specified period following the first administration of the investigational medicinal product will be summarized by CTCAE grade.

Clinical laboratory parameters, vital signs, and physical examination findings will be summarized according to study visit. The analysis will describe the observed values at each visit during the trial as well as the changes relative to baseline values.

## **7 INFORMED CONSENT**

Prior to any study-related procedures, all patients must provide written informed consent using the approved Informed Consent Form (ICF). The ICF has been reviewed and approved by the Ethics Committee. The informed consent process must be conducted in compliance with local laws and regulations. The content of the ICF must be understandable to the patient, and the patient has the right to have all questions regarding the study satisfactorily answered before signing. Consent must be voluntarily given by the patient without coercion. During the course of the study, if any amendments to the ICF are required, the revised form must be submitted by the Investigator to the Ethics Committee for review and approval. Newly enrolled patients must sign the most current, Ethics Committee-approved version of the ICF.

## 8 RISKS AND CONTROLS

The primary risks to subjects participating in this study include immune-mediated rejection (graft-versus-host disease) associated with the administration of allogeneic-sourced regenerative cardiomyocytes, adverse effects related to the administration of immunosuppressive medications, and the potential occurrence of ventricular arrhythmias following cardiomyocyte transplantation

### 8.1 Tumorigenicity Risk and Control Measures for Allogeneic Human-Derived Regenerative Cardiomyocytes

Stem cells share several characteristics with tumor cells, including sustained proliferative capacity and resistance to apoptosis, as well as similar growth regulatory mechanisms. Animal models have demonstrated that human embryonic stem cells (ESCs) or induced pluripotent stem cells (iPSCs) can lead to both benign and malignant teratomas. However, the cellular product utilized in the present study consists not of stem cells, but of fully differentiated cardiomyocytes. Theoretically, this confers a substantially reduced tumorigenic risk, which is supported by the absence of tumor formation in prior small and large animal studies. Numerous international studies utilizing cardiomyocytes differentiated from mesenchymal stem cells (MSCs) report no definitive evidence of tumorigenicity associated with human MSCs, even beyond passage 50. Recent preclinical studies investigating allogeneic human-derived regenerative cardiomyocytes for heart failure treatment consistently report no teratoma formation following cell transplantation therapy<sup>[9,18,24-27]</sup>; relevant safety data are summarized in Table 1.

One of the safety assessments in this study involves monitoring for the incidence of newly developed tumors through scheduled CT scans and positron emission tomography (PET) examinations. The objective is to achieve timely detection and diagnosis to mitigate the severe consequences associated with tumor progression. Should any new tumor be identified, histopathological examination will be performed to definitively determine its origin and assess any potential association with the cell transplantation.

### 8.2 Graft-Versus-Host Disease Risk and Control

The presence of donor-derived T lymphocytes within the cellular graft carries a risk of eliciting a graft-versus-host response, which can manifest as a severe clinical condition known as Graft-Versus-Host Disease (GvHD). GvHD is classified based on the time of onset post-transplantation: occurrences within 100 days are designated as Acute GvHD, while manifestations arising after 100 days are classified as Chronic GvHD.

#### 8.2.1 Acute GvHD

Acute GvHD, occurring early post-transplantation and representing a significant cause of early mortality, primarily affects the skin, gastrointestinal tract, and liver, with rare involvement of other organs. Cutaneous manifestations constitute the most frequent

---



presentation, characterized by erythema and maculopapular rash, often accompanied by pruritus or pain; lesions initially appear on the palms and soles, subsequently progressing to the face, ears, neck, trunk, and back, with severe cases demonstrating epidermal necrolysis and desquamation. Gastrointestinal involvement typically manifests as refractory diarrhea exceeding 1000 ml per day, associated with anorexia, nausea, and vomiting; advanced stages may feature abdominal pain with intestinal bleeding and obstruction. Hepatic involvement generally develops later, presenting as jaundice with elevated serum bilirubin and alkaline phosphatase levels. The majority of acute GvHD cases occur between 20 to 40 days following transplantation.

### **8.2.2      *Chronic GvHD***

Chronic GvHD typically manifests between 100 days and 1.5 years post-transplantation, with a minority of cases occurring up to 2 years. Incidence varies from 20% to 70% depending on graft source. Chronic GvHD frequently involves the oral mucosa, with xerostomia representing the earliest and most prevalent manifestation, often accompanied by oral pain or lichenoid mucosal changes. Cutaneous involvement initially presents as lichen planus-like lesions or polygonal papules, progressing in severe cases to generalized dermatopathy; late-stage skin changes include hyperpigmentation, atrophy, and fibrosis resembling scleroderma, potentially causing joint contractures and restricted mobility. Ocular involvement manifests as dry eye syndrome with significantly reduced tear production. Hepatic dysfunction is common, primarily evidenced by jaundice with histopathological findings of hepatic necrosis or cirrhosis. Gastrointestinal compromise frequently features esophageal pathology causing dysphagia and pain, potentially leading to weight loss; barium swallow studies demonstrate tapered esophageal strictures. Pulmonary involvement affecting bronchi and lung parenchyma may result in diminished pulmonary function and dyspnea. Additionally, Chronic GvHD is associated with immunodeficiency leading to recurrent infections, and persistent thrombocytopenia predisposing to hemorrhagic complications.

### **8.2.3      *Treatment of GvHD***

Standard first-line therapy for acute GvHD involves intravenous administration of methylprednisolone (a glucocorticoid), with potential dose escalation based on disease severity. Second-line therapy consists of one of the following agents: tacrolimus or mycophenolate mofetil; patients exhibiting suboptimal response to second-line therapy often receive combination therapy with methylprednisolone. Additionally, anti-T-cell monoclonal antibodies (e.g., anti-CD3 monoclonal antibody) may be utilized in patients refractory to methylprednisolone, while antibodies targeting the interleukin-2 receptor also demonstrate efficacy. For chronic GvHD, standard first-line therapy entails early initiation of prednisolone combined with azathioprine, followed by gradual tapering upon clinical improvement, with a total treatment duration of approximately one year. In cases accompanied by thrombocytopenia with reduced megakaryocytes in the bone marrow, prednisolone combined with cyclosporine A is preferred. Patients refractory to the

---

aforementioned therapies may receive second-line agents, including one of the following: tacrolimus or mycophenolate mofetil.

### 8.3 Immunosuppressive Medication Adverse Effects and Mitigation Strategies

The human immune system maintains highly sophisticated defense mechanisms against pathogenic agents, enabling the identification and targeted elimination of non-self entities including bacteria, viruses, foreign materials, allogeneic tissues, and synthetic implants. This complex immunological response represents a critical protective mechanism. Following allogeneic tissue or organ transplantation, the graft is recognized by the recipient's immune system as a non-self entity, triggering an immune-mediated attack that manifests as transplant rejection—a process involving graft destruction and clearance. Transplant rejection constitutes a primary determinant of graft survival. The administration of immunosuppressive medications represents an established therapeutic strategy for the effective prevention of transplant rejection.

**Glucocorticoids** : Adverse reactions associated with glucocorticoids are infrequent during short-term therapy but warrant vigilant monitoring. Potential adverse effects include: increased susceptibility to infections; drug hypersensitivity reactions; endocrine abnormalities; metabolic and nutritional disorders; gastrointestinal complications; skin and subcutaneous tissue disorders; musculoskeletal and connective tissue abnormalities; and menstrual irregularities.

**Tacrolimus**: This agent exerts its immunosuppressive effect primarily through inhibition of calcium-dependent signal transduction, thereby suppressing lymphokine production. A significant adverse effect is the inhibition of insulin secretion leading to hyperglycemia. Additional adverse reactions encompass hematological abnormalities; neurological manifestations; ophthalmic disturbances; tinnitus; respiratory disorders; gastrointestinal manifestations; renal impairment; dermatological effects; musculoskeletal complaints; and metabolic derangements.

**Mycophenolate Sodium**: This novel immunosuppressive agent employs a sodium salt substitution for the ester moiety present in mycophenolate mofetil, aiming to reduce gastrointestinal adverse effects associated with the ester group while maintaining efficacy in preventing transplant rejection. The most frequently reported adverse drug reactions include leukopenia and diarrhea. Additional potential adverse effects encompass infections; hematological abnormalities; headache; cough; gastrointestinal disturbances; abnormal liver function tests; elevated serum creatinine; and rash.

**Basiliximab for Injection** (e.g., Simulect): As an interleukin-2 (IL-2) receptor antagonist, basiliximab is associated with adverse reactions primarily including constipation, urinary tract infection, pain, nausea, hypertension, anemia, headache, hyperkalemia, hypercholesterolemia, surgical wound complications, weight gain, elevated serum creatinine, hypophosphatemia, diarrhea, and upper respiratory tract infection.

---

**Safety Monitoring During Immunosuppressive Therapy:** Subjects enrolled in this study will receive immunosuppressive therapy for a maximum duration of one month at reduced dosing levels. To mitigate the potential adverse effects associated with these agents, rigorous safety monitoring will be implemented throughout the dosing period. This includes scheduled assessments of hematological parameters, renal and hepatic function, quantitative immunoglobulin levels and lymphocyte subsets, as mandated by the protocol. Vigilant clinical monitoring for signs of adverse events or complications will be maintained. Prophylactic measures, including anti-infective prophylaxis and nutritional support, will be implemented per protocol-specified guidelines.

#### **8.4 Post-Transplant Ventricular Arrhythmias Risks and Control**

Fatal malignant ventricular arrhythmias constitute a potentially severe risk associated with myocardial cell therapy. Ventricular arrhythmias, particularly polymorphic ventricular tachycardia and ventricular fibrillation, represent significant in-hospital causes of early mortality in myocardial infarction (MI) patients. The resulting tissue architecture, comprising necrotic scar, border zones, and viable myocardium, creates regions of heterogeneous electrophysiology, particularly within the peri-infarct zone, fostering anisotropic conduction and reentrant circuits. Cell therapy targeting the infarcted myocardium inherently modifies this arrhythmogenic substrate. Theoretically, such interventions carry dual potential: therapeutic augmentation of the substrate may reduce arrhythmia susceptibility, while proarrhythmic exacerbation remains a concurrent possibility. Whether cell therapy exerts proarrhythmic effects depends critically upon multiple factors: (1) the specific cell type employed; (2) the degree of electrophysiological integration and coupling between transplanted cells and native myocardium; and (3) intrinsic electrophysiological properties of the transplanted cells themselves. Transplanted cells may introduce novel proarrhythmic substrates by establishing reentrant pathways within scar tissue or inducing arrhythmias via mechanisms of ectopic automaticity or triggered activity.

Animal experimental evidence regarding the proarrhythmic effects of cell-based therapies remains limited and conflicting. Some studies indicate that transplanted cells, which originally lack connexin 43 expression, can acquire this critical gap junction protein post-engraftment; connexin 43 is essential for facilitating coordinated electrical conduction within myocardial tissue. However, persistent concerns exist based on studies suggesting that cardiomyocytes derived from embryonic stem cells (ESCs) may harbor intrinsic proarrhythmic risks. Notably, research by Shiba et al. demonstrated that treatment of heart failure in nonhuman primates using induced pluripotent stem cell (iPSC)-derived cardiomyocytes did not result in fatal arrhythmias <sup>[18]</sup>.

Clinical investigations initiated by Professor Menasche P. et al. (French Academy of Sciences) in 2015, involving multiple patients treated with human pluripotent stem cell (hPSC)-derived cardiac progenitor cells for heart failure <sup>[24, 25]</sup>, have not reported any proarrhythmic effects to date. Nevertheless, further clinical data are required to definitively establish the arrhythmic safety profile of cell-based therapies. Collectively,

---

current clinical trial results across various cell therapy approaches have not reported significant arrhythmic risks; paradoxically, some evidence suggests stem cell therapy may represent a potential therapeutic strategy for post-infarction ventricular tachycardia. Specifically, transplantation of mesenchymal stem cells into myocardial infarct zones has been associated with myocardial repair, improved cardiac function, and no increased susceptibility to ventricular arrhythmias.

Given the theoretical potential for proarrhythmia associated with allogeneic human-derived regenerated cardiomyocyte therapy in this study, the following risk mitigation measures will be implemented: (1) Continuous electrocardiographic (ECG) monitoring will be employed for all subjects throughout the peri-procedural period. Following hospital discharge, subjects will be provided with remote cardiac monitoring devices at no cost to facilitate ongoing rhythm assessment. This remote monitoring infrastructure enables investigators to promptly evaluate subject cardiac rhythm status and detect potential arrhythmic events in a timely manner; (2) Arrhythmic risk stratification will utilize 24-hour Holter monitoring performed within 24 hours post-procedure; subjects identified as high-risk for ventricular arrhythmias (e.g., frequent premature ventricular contractions [PVCs] >6 per minute) will receive antiarrhythmic prophylaxis.

## **8.5 Donor Safety Risks and Control**

The human-derived regenerative cardiomyocytes utilized in this study are cell suspension preparations obtained from the blood of healthy adult donors via in vitro preparation methods. To minimize potential risks associated with the donor source, a rigorous Donor Eligibility Determination was conducted for all donors, comprising detailed examinations and testing. This included comprehensive assessment of the donor's medical history and family history, alongside thorough laboratory investigations. Laboratory testing encompassed screening for relevant infectious diseases (HIV, HBV, HCV, HTLV, and syphilis); only healthy adults testing negative for all specified infectious agents were deemed eligible. Beyond routine laboratory screening, donors underwent karyotype analysis and whole-genome sequencing to exclude potential hereditary cancers and cardiac diseases.

All testing protocols were performed in strict accordance with the 3rd Edition of Research, Development and Quality Control of Biotechnology Pharmaceuticals and relevant FDA regulations (21 CFR Part 1271; <http://www.fda.gov/BiologicsBloodVaccines/GuidanceComplianceRegulatoryInformation/Guidances/Tissue/ucm073964.htm>).

# **9 RESEARCH ORGANIZATION STRUCTURE**

## **9.1 Sponsor and Responsibilities**

Help Therapeutics Co., Ltd. serves as the Sponsor for this study and is responsible for study initiation and coordination. Specific responsibilities include:

---

- 1) screening of clinical investigators;
- 2) activating the research center upon receipt of all required documentation;
- 3) establishing the study database and assisting in data analysis;
- 4) reviewing the veracity, accuracy, and completeness of collected data;
- 5) ensuring all adverse events (AEs) and adverse drug reactions (ADRs) are reported and confirmed by the investigator. In the case of serious adverse events (SAEs) or death, the Sponsor is responsible for confirming reporting to the Ethics Committee.

## **9.2 Clinical Research Coordinator**

The overall clinical coordinator for this study is Dr. Zhang He, a cardiologist.

Contact details are as follows: Nanjing Drum Tower Hospital, 321 Zhongshan Road, Nanjing 210008, Jiangsu Province, People's Republic of China.

Telephone: 15250969968.

Email: [pumczhanghe@163.com](mailto:pumczhanghe@163.com)

## **9.3 Investigator and Responsibilities**

Professor Dongjin Wang serves as the Investigator and is the responsible person for the implementation of this study at the site. The Investigator is accountable for clinical decisions related to this study and for organizing/managing personnel involved in the study. The Investigator must conduct the study strictly in accordance with the protocol and signed agreements. By agreeing to conduct the study, the Investigator accepts monitoring, auditing, and supervision by the Ethics Committee. Responsibilities include:

- 1) Signing the Investigator Agreement;
  - 2) Obtaining written approval from the Ethics Committee;
  - 3) Implementing the study plan per protocol requirements;
  - 4) Screening eligible patients;
  - 5) Collecting data and accepting monitoring. Any omissions or errors in data must be promptly completed or corrected.
-

## **9.4 Informed Consent Process**

The investigator or his/her representative will explain the nature of the study to the subject or his/her legally authorized representative and answer all questions regarding the study.

Subjects must be informed that their participation is voluntary. subjects or their legally authorized representative will be required to sign a statement of informed consent that meets the requirements of 21 CFR 50, local regulations, ICH guidelines, Health Insurance Portability and Accountability Act (HIPAA) requirements, where applicable, and the IRB/IEC or study center.

The medical record must include a statement that written informed consent was obtained before the subject was enrolled in the study and the date the written consent was obtained. The authorized person obtaining the informed consent must also sign the ICF.

Subjects must be re-consented to the most current version of the ICF(s) during their participation in the study.

A copy of the ICF(s) must be provided to the subject or the subject's legally authorized representative.

A subject who is rescreened is not required to sign another ICF if the rescreening occurs within 28 days from the previous ICF signature date.

The ICF will contain a separate section that addresses the use of remaining mandatory samples for optional exploratory research. The investigator or authorized designee will explain to each subject the objectives of the exploratory research. Subjects will be told that they are free to refuse to participate and may withdraw their consent at any time and for any reason during the storage period. A separate signature will be required to document a subject's agreement to allow any remaining specimens to be used for exploratory research. Subjects who decline to participate in this optional research will not provide this separate signature.

---

## 10 REFERENCES

1. Bergmann, O., et al., Dynamics of Cell Generation and Turnover in the Human Heart. *Cell*, 2015. 161(7): p. 1566-75.
  2. Aguirre, A., I. Sancho-Martinez, and J.C. Izpisua Belmonte, Reprogramming toward heart regeneration: stem cells and beyond. *Cell Stem Cell*, 2013. 12(3): p. 275-84.
  3. Beltrami, A.P., et al., Evidence that human cardiac myocytes divide after myocardial infarction. *N Engl J Med*, 2001. 344(23): p. 1750-7.
  4. Bergmann, O., et al., Evidence for cardiomyocyte renewal in humans. *Science*, 2009. 324(5923): p. 98-102.
  5. Takahashi, K. and S. Yamanaka, Induction of pluripotent stem cells from mouse embryonic and adult fibroblast cultures by defined factors. *Cell*, 2006. 126(4): p. 663-76.
  6. Burridge, P.W., et al., Chemically defined generation of human cardiomyocytes. *Nat Methods*, 2014. 11(8): p. 855-60.
  7. Guyette, J.P., et al., Bioengineering Human Myocardium on Native Extracellular Matrix. *Circ Res*, 2016. 118(1): p. 56-72.
  8. Chong, J.J., et al., Human embryonic-stem-cell-derived cardiomyocytes regenerate non-human primate hearts. *Nature*, 2014. 510(7504): p. 273-7.
  9. Blin, G., et al., A purified population of multipotent cardiovascular progenitors derived from primate pluripotent stem cells engrafts in postmyocardial infarcted nonhuman primates. *J Clin Invest*, 2010. 120(4): p. 1125-39.
  10. Laflamme, M.A., et al., Formation of human myocardium in the rat heart from human embryonic stem cells. *Am J Pathol*, 2005. 167(3): p. 663-71.
  11. van Laake, L.W., et al., Human embryonic stem cell-derived cardiomyocytes survive and mature in the mouse heart and transiently improve function after myocardial infarction. *Stem Cell Res*, 2007. 1(1): p. 9-24.
  12. Zhu, K., et al., Lack of Remuscularization Following Transplantation of Human Embryonic Stem Cell-Derived Cardiovascular Progenitor Cells in Infarcted Nonhuman Primates. *Circ Res*, 2018. 122(7): p. 958-969.
-

13. Miki, K., et al., Bioengineered myocardium derived from induced pluripotent stem cells improves cardiac function and attenuates cardiac remodeling following chronic myocardial infarction in rats. *Stem Cells Transl Med*, 2012. 1(5): p. 430-7.
  14. Higuchi, T., et al., Functional and Electrical Integration of Induced Pluripotent Stem Cell-Derived Cardiomyocytes in a Myocardial Infarction Rat Heart. *Cell Transplant*, 2015. 24(12): p. 2479-89.
  15. Kawamura, M., et al., Feasibility, safety, and therapeutic efficacy of human induced pluripotent stem cell-derived cardiomyocyte sheets in a porcine ischemic cardiomyopathy model. *Circulation*, 2012. 126(11 Suppl 1): p. S29-37.
  16. Weinberger, F., et al., Cardiac repair in guinea pigs with human engineered heart tissue from induced pluripotent stem cells. *Sci Transl Med*, 2016. 8(363): p. 363ra148.
  17. Gao, L., et al., Large Cardiac Muscle Patches Engineered From Human Induced-Pluripotent Stem Cell-Derived Cardiac Cells Improve Recovery From Myocardial Infarction in Swine. *Circulation*, 2018. 137(16): p. 1712-1730.
  18. Shiba, Y., et al., Allogeneic transplantation of iPS cell-derived cardiomyocytes regenerates primate hearts. *Nature*, 2016. 538(7625): p. 388-391.
  19. Strauer, B.E., et al., Repair of infarcted myocardium by autologous intracoronary mononuclear bone marrow cell transplantation in humans. *Circulation*, 2002. 106(15): p. 1913-8.
  20. Assmus, B., et al., Effect of shock wave-facilitated intracoronary cell therapy on LVEF in patients with chronic heart failure: the CELLWAVE randomized clinical trial. *JAMA*, 2013. 309(15): p. 1622-31.
  21. Siminiak, T., et al., Percutaneous trans-coronary-venous transplantation of autologous skeletal myoblasts in the treatment of post-infarction myocardial contractility impairment: the POZNAN trial. *Eur Heart J*, 2005. 26(12): p. 1188-95.
  22. Chugh, A.R., et al., Administration of cardiac stem cells in patients with ischemic cardiomyopathy: the SCIPIO trial: surgical aspects and interim analysis of myocardial function and viability by magnetic resonance. *Circulation*, 2012. 126(11 Suppl 1): p. S54-64.
  23. Karantalis, V., et al., Autologous mesenchymal stem cells produce concordant improvements in regional function, tissue perfusion, and fibrotic burden when administered to patients undergoing coronary artery bypass grafting: The Prospective Randomized Study of Mesenchymal Stem Cell Therapy in Patients Undergoing Cardiac Surgery (PROMETHEUS) trial. *Circ Res*, 2014. 114(8): p. 1302-10.
-



24. Menasche, P., et al., Human embryonic stem cell-derived cardiac progenitors for severe heart failure treatment: first clinical case report. *Eur Heart J*, 2015. 36(30): p. 2011-7.
  25. Menasche, P., et al., Transplantation of Human Embryonic Stem Cell-Derived Cardiovascular Progenitors for Severe Ischemic Left Ventricular Dysfunction. *J Am Coll Cardiol*, 2018. 71(4): p. 429-438.
  26. Peruzzi, M., et al., State of the Art on the Evidence Base in Cardiac Regenerative Therapy: Overview of 41 Systematic Reviews. *Biomed Res Int*, 2015. 2015: p. 613782.
  27. Fernandez-Aviles, F., et al., Global position paper on cardiovascular regenerative medicine. *Eur Heart J*, 2017. 38(33): p. 2532-2546.
  28. Cao, F., et al., Long-term myocardial functional improvement after autologous bone marrow mononuclear cells transplantation in patients with ST-segment elevation myocardial infarction: 4 years follow-up. *Eur Heart J*, 2009. 30(16): p. 1986-94.
  29. Choudry, F., et al., A randomized double-blind control study of early intra-coronary autologous bone marrow cell infusion in acute myocardial infarction: the REGENERATE-AMI clinical trial dagger. *Eur Heart J*, 2016. 37(3): p. 256-63.
  30. Huikuri, H.V., et al., Effects of intracoronary injection of mononuclear bone marrow cells on left ventricular function, arrhythmia risk profile, and restenosis after thrombolytic therapy of acute myocardial infarction. *Eur Heart J*, 2008. 29(22): p. 2723-32.
  31. Janssens, S., et al., Autologous bone marrow-derived stem-cell transfer in patients with ST-segment elevation myocardial infarction: double-blind, randomised controlled trial. *Lancet*, 2006. 367(9505): p. 113-21.
  32. Lunde, K., et al., Intracoronary injection of mononuclear bone marrow cells in acute myocardial infarction. *N Engl J Med*, 2006. 355(12): p. 1199-209.
  33. Roncalli, J., et al., Intracoronary autologous mononucleated bone marrow cell infusion for acute myocardial infarction: results of the randomized multicenter BONAMI trial. *Eur Heart J*, 2011. 32(14): p. 1748-57.
  34. San Roman, J.A., et al., Comparison of Different Bone Marrow-Derived Stem Cell Approaches in Reperfused STEMI. A Multicenter, Prospective, Randomized, Open-Labeled TECAM Trial. *J Am Coll Cardiol*, 2015. 65(22): p. 2372-82.
  35. Schachinger, V., et al., Intracoronary bone marrow-derived progenitor cells in acute myocardial infarction. *N Engl J Med*, 2006. 355(12): p. 1210-21.
-

36. Traverse, J.H., et al., Effect of the use and timing of bone marrow mononuclear cell delivery on left ventricular function after acute myocardial infarction: the TIME randomized trial. *JAMA*, 2012. 308(22): p. 2380-9.
  37. Wollert, K.C., et al., Intracoronary autologous bone-marrow cell transfer after myocardial infarction: the BOOST randomised controlled clinical trial. *Lancet*, 2004. 364(9429): p. 141-8.
  38. Surder, D., et al., Effect of Bone Marrow-Derived Mononuclear Cell Treatment, Early or Late After Acute Myocardial Infarction: Twelve Months CMR and Long-Term Clinical Results. *Circ Res*, 2016. 119(3): p. 481-90.
  39. Lee, J.W., et al., A randomized, open-label, multicenter trial for the safety and efficacy of adult mesenchymal stem cells after acute myocardial infarction. *J Korean Med Sci*, 2014. 29(1): p. 23-31.
  40. Assmus, B., et al., Transplantation of Progenitor Cells and Regeneration Enhancement in Acute Myocardial Infarction (TOPCARE-AMI). *Circulation*, 2002. 106(24): p. 3009-17.
  41. Bartunek, J., et al., Intracoronary injection of CD133-positive enriched bone marrow progenitor cells promotes cardiac recovery after recent myocardial infarction: feasibility and safety. *Circulation*, 2005. 112(9 Suppl): p. I178-83.
  42. Tendera, M., et al., Intracoronary infusion of bone marrow-derived selected CD34+CXCR4+ cells and non-selected mononuclear cells in patients with acute STEMI and reduced left ventricular ejection fraction: results of randomized, multicentre Myocardial Regeneration by Intracoronary Infusion of Selected Population of Stem Cells in Acute Myocardial Infarction (REGENT) Trial. *Eur Heart J*, 2009. 30(11): p. 1313-21.
  43. Houtgraaf, J.H., et al., First experience in humans using adipose tissue-derived regenerative cells in the treatment of patients with ST-segment elevation myocardial infarction. *J Am Coll Cardiol*, 2012. 59(5): p. 539-40.
  44. Makkar, R.R., et al., Intracoronary cardiosphere-derived cells for heart regeneration after myocardial infarction (CADUCEUS): a prospective, randomised phase 1 trial. *Lancet*, 2012. 379(9819): p. 895-904.
  45. Dib, N., et al., One-year follow-up of feasibility and safety of the first U.S., randomized, controlled study using 3-dimensional guided catheter-based delivery of autologous skeletal myoblasts for ischemic cardiomyopathy (CAuSMIC study). *JACC Cardiovasc Interv*, 2009. 2(1): p. 9-16.
  46. Duckers, H.J., et al., Final results of a phase IIa, randomised, open-label trial to evaluate the percutaneous intramyocardial transplantation of autologous skeletal myoblasts in congestive
-

heart failure patients: the SEISMIC trial. *EuroIntervention*, 2011. 6(7): p. 805-12.

47. Menasche, P., et al., The Myoblast Autologous Grafting in Ischemic Cardiomyopathy (MAGIC) trial: first randomized placebo-controlled study of myoblast transplantation. *Circulation*, 2008. 117(9): p. 1189-200.
  48. Povsic, T.J., et al., A double-blind, randomized, controlled, multicenter study to assess the safety and cardiovascular effects of skeletal myoblast implantation by catheter delivery in patients with chronic heart failure after myocardial infarction. *Am Heart J*, 2011. 162(4): p. 654-662 e1.
  49. Hendrikx, M., et al., Recovery of regional but not global contractile function by the direct intramyocardial autologous bone marrow transplantation: results from a randomized controlled clinical trial. *Circulation*, 2006. 114(1 Suppl): p. I101-7.
  50. Hu, S., et al., Isolated coronary artery bypass graft combined with bone marrow mononuclear cells delivered through a graft vessel for patients with previous myocardial infarction and chronic heart failure: a single-center, randomized, double-blind, placebo-controlled clinical trial. *J Am Coll Cardiol*, 2011. 57(24): p. 2409-15.
  51. Mozid, A., et al., Safety and feasibility of intramyocardial versus intracoronary delivery of autologous cell therapy in advanced heart failure: the REGENERATE-IHD pilot study. *Regen Med*, 2014. 9(3): p. 269-78.
  52. Yao, K., et al., Administration of intracoronary bone marrow mononuclear cells on chronic myocardial infarction improves diastolic function. *Heart*, 2008. 94(9): p. 1147-53.
  53. Heldman, A.W., et al., Transendocardial mesenchymal stem cells and mononuclear bone marrow cells for ischemic cardiomyopathy: the TAC-HFT randomized trial. *JAMA*, 2014. 311(1): p. 62-73.
  54. Mathiasen, A.B., et al., Bone marrow-derived mesenchymal stromal cell treatment in patients with severe ischaemic heart failure: a randomized placebo-controlled trial (MSC-HF trial). *Eur Heart J*, 2015. 36(27): p. 1744-53.
  55. Assmus, B., et al., Transcoronary transplantation of progenitor cells after myocardial infarction. *N Engl J Med*, 2006. 355(12): p. 1222-32.
  56. Honold, J., et al., G-CSF stimulation and coronary reinfusion of mobilized circulating mononuclear proangiogenic cells in patients with chronic ischemic heart disease: five-year results of the TOPCARE-G-CSF trial. *Cell Transplant*, 2012. 21(11): p. 2325-37.
  57. Nasser, B.A., et al., Autologous CD133+ bone marrow cells and bypass grafting for
-

- regeneration of ischaemic myocardium: the Cardio133 trial. *Eur Heart J*, 2014. 35(19): p. 1263-74.
58. Perin, E.C., et al., Randomized, double-blind pilot study of transendocardial injection of autologous aldehyde dehydrogenase-bright stem cells in patients with ischemic heart failure. *Am Heart J*, 2012. 163(3): p. 415-21, 421 e1.
59. Patel, A.N., et al., Ixmyelocel-T for patients with ischaemic heart failure: a prospective randomised double-blind trial. *Lancet*, 2016. 387(10036): p. 2412-21.
60. Bartunek, J., et al., Cardiopoietic stem cell therapy in heart failure: the C-CURE (Cardiopoietic stem Cell therapy in heart failURE) multicenter randomized trial with lineage-specified biologics. *J Am Coll Cardiol*, 2013. 61(23): p. 2329-38.
61. Bolli, R., et al., Cardiac stem cells in patients with ischaemic cardiomyopathy (SCIPIO): initial results of a randomised phase 1 trial. *Lancet*, 2011. 378(9806): p. 1847-57.
62. Simons, M., et al., Pharmacological treatment of coronary artery disease with recombinant fibroblast growth factor-2: double-blind, randomized, controlled clinical trial. *Circulation*, 2002. 105(7): p. 788-93.
63. Kastrup, J., et al., Direct intramyocardial plasmid vascular endothelial growth factor-A165 gene therapy in patients with stable severe angina pectoris A randomized double-blind placebo-controlled study: the Euroinject One trial. *J Am Coll Cardiol*, 2005. 45(7): p. 982-8.
64. Greenberg, B., et al., Calcium upregulation by percutaneous administration of gene therapy in patients with cardiac disease (CUPID 2): a randomised, multinational, double-blind, placebo-controlled, phase 2b trial. *Lancet*, 2016. 387(10024): p. 1178-86.
65. Perin, E.C., et al., A randomized study of transendocardial injection of autologous bone marrow mononuclear cells and cell function analysis in ischemic heart failure (FOCUS-HF). *Am Heart J*, 2011. 161(6): p. 1078-87 e3.
66. Perin, E.C., et al., Effect of transendocardial delivery of autologous bone marrow mononuclear cells on functional capacity, left ventricular function, and perfusion in chronic heart failure: the FOCUS-CCTRN trial. *JAMA*, 2012. 307(16): p. 1717-26.
67. Tse, H.F., et al., Prospective randomized trial of direct endomyocardial implantation of bone marrow cells for treatment of severe coronary artery diseases (PROTECT-CAD trial). *Eur Heart J*, 2007. 28(24): p. 2998-3005.
68. van Ramshorst, J., et al., Intramyocardial bone marrow cell injection for chronic myocardial ischemia: a randomized controlled trial. *JAMA*, 2009. 301(19): p. 1997-2004.
-

69. Losordo, D.W., et al., Intramyocardial, autologous CD34+ cell therapy for refractory angina. *Circ Res*, 2011. 109(4): p. 428-36.
  70. Losordo, D.W., et al., Intramyocardial transplantation of autologous CD34+ stem cells for intractable angina: a phase I/IIa double-blind, randomized controlled trial. *Circulation*, 2007. 115(25): p. 3165-72.
  71. Wang, W.E., et al., Prolyl hydroxylase domain protein 2 silencing enhances the survival and paracrine function of transplanted adipose-derived stem cells in infarcted myocardium. *Circ Res*, 2013. 113(3): p. 288-300.
  72. Perin, E.C., et al., Adipose-derived regenerative cells in patients with ischemic cardiomyopathy: The PRECISE Trial. *Am Heart J*, 2014. 168(1): p. 88-95 e2.
  73. Seth, S., et al., Percutaneous intracoronary cellular cardiomyoplasty for nonischemic cardiomyopathy: clinical and histopathological results: the first-in-man ABCD (Autologous Bone Marrow Cells in Dilated Cardiomyopathy) trial. *J Am Coll Cardiol*, 2006. 48(11): p. 2350-1.
  74. Bocchi, E.A., et al., Granulocyte-colony stimulating factor or granulocyte-colony stimulating factor associated to stem cell intracoronary infusion effects in non ischemic refractory heart failure. *Int J Cardiol*, 2010. 138(1): p. 94-7.
  75. Vrtovec, B., et al., Effects of intracoronary CD34+ stem cell transplantation in nonischemic dilated cardiomyopathy patients: 5-year follow-up. *Circ Res*, 2013. 112(1): p. 165-73.
  76. Mushtaq, M., et al., Rationale and design of the Percutaneous Stem Cell Injection Delivery Effects on Neomyogenesis in Dilated Cardiomyopathy (the POSEIDON-DCM study): a phase I/II, randomized pilot study of the comparative safety and efficacy of transendocardial injection of autologous mesenchymal stem cell vs. allogeneic mesenchymal stem cells in patients with non-ischemic dilated cardiomyopathy. *J Cardiovasc Transl Res*, 2014. 7(9): p. 769-80.
  77. Prochazka, V., et al., Cell therapy, a new standard in management of chronic critical limb ischemia and foot ulcer. *Cell Transplant*, 2010. 19(11): p. 1413-24.
  78. Losordo, D.W., et al., A randomized, controlled pilot study of autologous CD34+ cell therapy for critical limb ischemia. *Circ Cardiovasc Interv*, 2012. 5(6): p. 821-30.
  79. Perin, E.C., et al., A randomized, controlled study of autologous therapy with bone marrow-derived aldehyde dehydrogenase bright cells in patients with critical limb ischemia. *Catheter Cardiovasc Interv*, 2011. 78(7): p. 1060-
-

80. Belch, J., et al., Effect of fibroblast growth factor NV1FGF on amputation and death: a randomised placebo-controlled trial of gene therapy in critical limb ischaemia. *Lancet*, 2011. 377(9781): p. 1929-37.
  81. Creager, M.A., et al., Effect of hypoxia-inducible factor-1alpha gene therapy on walking performance in patients with intermittent claudication. *Circulation*, 2011. 124(16): p. 1765-73.
  82. Menasche, P., et al., Myoblast transplantation for heart failure. *Lancet*, 2001. 357(9252): p. 279-80.
-
