# Supplementary material for: Epicardial Injections of Allogenic Human Induced Pluripotent Stem Cells-derived Cardiomyocytes for Severe Chronic Ischemic Heart Failure: The HEAL-CHF Trial
Source: Research Square preprint supplement (doi:10.21203/rs.3.rs-7414031/v1), 2025-09-23
Supplement: Supplementary file 2 [file f38948f79f350c30ecc56eaa.pdf]

## SUPPLEMENTARY TABLES

**Table S1. Inclusion/Exclusion Criteria**

| <b>Inclusion Criteria</b>                                                                                                                                                                                           |
|---------------------------------------------------------------------------------------------------------------------------------------------------------------------------------------------------------------------|
| Aged 35-75 (including 35 and 75).                                                                                                                                                                                   |
| Have signed the Informed Consent Form.                                                                                                                                                                              |
| Patients have chronic left ventricular dysfunction.                                                                                                                                                                 |
| Patients have NYHA Class III-IV cardiac function in spite of optimal heart failure maximally tolerated guideline-directed medical therapy.                                                                          |
| Patients have indications for Coronary Artery Bypass Grafting.                                                                                                                                                      |
| $20\% \leq \text{LVEF} \leq 45\%$ as determined by echocardiogram (data collected up to 6 months prior to inclusion evaluation are valid; data collected within 1 month since a myocardial infarction are invalid). |
| Weakening or absence of segmental regional wall motion as determined by standard imaging.                                                                                                                           |
| <b>Exclusion Criteria</b>                                                                                                                                                                                           |
| PRA $\geq 20\%$ or DSA-positive.                                                                                                                                                                                    |
| Previous implantation of ICD, CRT or similar treatment.                                                                                                                                                             |
| Valvular heart disease or received heart valvular disease                                                                                                                                                           |
| Previous percutaneous transluminal coronary intervention (PCI)                                                                                                                                                      |
| Atrial fibrillation                                                                                                                                                                                                 |
| History of sustained ventricular tachycardia or sudden cardiac death.                                                                                                                                               |
| Baseline glomerular filtration rate $<30\text{ml/min/1.73m}^2$ .                                                                                                                                                    |
| Liver dysfunction, as evidenced by enzymes (AST and ALT) greater than three times the ULN.                                                                                                                          |
| Hematological abnormality: A hematocrit $<25\%$ as determined by HCT, white blood cell $<2500/\text{ul}$ or platelet values $<100000/\text{ul}$ without another explanation.                                        |
| Known, serious radiographic contrast allergy, penicillin allergy, streptomycin allergy.                                                                                                                             |
| Coagulopathy (INR $>1.3$ ) not due to a reversible cause.                                                                                                                                                           |
| Contra-indication to performance of an MRI scan.                                                                                                                                                                    |
| History of organ transplant.                                                                                                                                                                                        |
| Clinical history of malignancy within 5 years (patients with prior malignancy                                                                                                                                       |

must be disease-free for 5 years).

Non-cardiac condition that limits lifespan <1 year.

Chronic therapy with immunosuppressant medication, such as glucocorticoids and TNF $\alpha$  antagonist.

Patients' allergy to or contra-indication to immunosuppressants.

Serum positivity for HIV, HBV, HCV, TP.

Currently enrolled in other investigational therapeutic or device study.

Female patient who is pregnant or breast-feeding.

Other conditions that researchers consider not suitable to participate in this study.

**Table S2. Proportion of Premature ventricular beats to total heartbeats**

**assessed by Holter monitoring within 1-month postoperatively in all patients.**

| No.                       | D7    | D14   | D21  | D28   |
|---------------------------|-------|-------|------|-------|
| <b>Control group</b>      |       |       |      |       |
| 003                       | 0.10% | 0.10% | < 1% | < 1%  |
| 004                       | < 1%  | < 1%  | < 1% | < 1%  |
| 006                       | 2%    | 1%    | 2%   | 2%    |
| 007                       | 1%    | < 1%  | 3%   | 2.30% |
| 010                       | < 1%  | < 1%  | < 1% | < 1%  |
| 011                       | < 1%  | < 1%  | < 1% | < 1%  |
| 014                       | < 1%  | < 1%  | < 1% | < 1%  |
| 015                       | < 1%  | < 1%  | < 1% | < 1%  |
| 019                       | < 1%  | NA    | NA   | NA    |
| 020                       | 2%    | NA    | NA   | NA    |
| <b>Cell therapy group</b> |       |       |      |       |
| 001                       | 6.20% | 100%  | 100% | 100%  |
| 002                       | 0.70% | 32%   | 4%   | < 1%  |
| 005                       | < 1%  | 9%    | 18%  | 13%   |
| 008                       | 0.52% | 94%   | 3%   | 5%    |
| 009                       | 0.02  | 82    | < 1% | < 1%  |
| 012                       | 27    | < 1%  | 2%   | 2%    |
| 013                       | < 1%  | 97%   | 95%  | 7%    |
| 016                       | 5%    | 100%  | < 1% | < 1%  |
| 017                       | 47%   | 99%   | 77%  | 86%   |
| 018                       | < 1%  | 98%   | < 1% | < 1%  |

**Table S3. Serious Adverse Events**

| Case No. | Serious adverse event         | Group        | Causality          | Outcome  |
|----------|-------------------------------|--------------|--------------------|----------|
| 001      | Ventricular tachycardia       | Cell therapy | Possibly Related   | Resolved |
| 001      | Cardiac dysfunction           | Cell therapy | Possibly unrelated | Improved |
| 001      | Severe hepatic impairment     | Cell therapy | Possibly unrelated | Resolved |
| 008      | Severe hepatorenal impairment | Cell therapy | Possibly unrelated | Resolved |
| 008      | Ventricular tachycardia       | Cell therapy | Possibly Related   | Resolved |
| 018      | Ventricular fibrillation      | Cell therapy | Possibly unrelated | Resolved |
| 019      | Cardiac arrest                | Control      | Unrelated          | Fatal    |

**Table S4. Adverse Events**

|                                    | Control<br>n=10 | Cell therapy<br>n=10 |
|------------------------------------|-----------------|----------------------|
| Serious adverse events             |                 |                      |
| Ventricular Tachycardia            | 0               | 2 (20%)              |
| Cardiac dysfunction                | 0               | 1 (10%)              |
| Ventricular Fibrillation           | 0               | 1 (10%)              |
| Cardiac arrest                     | 1 (10%)         | 0                    |
| Severe hepatic impairment          | 0               | 1 (10%)              |
| Severe hepatorenal impairment      | 0               | 1 (10%)              |
| Non-serious adverse events         |                 |                      |
| Premature Ventricular Complex      | 6 (60%)         | 10 (100%)            |
| Ventricular Tachycardia            | 0               | 8 (80%)              |
| Accelerated Idioventricular Rhythm | 0               | 6 (60%)              |
| Sinus Tachycardia                  | 1 (10%)         | 1 (10%)              |
| Atrial Tachycardia                 | 1 (10%)         | 1 (10%)              |
| Premature Atrial Complex           | 3 (30%)         | 5 (50%)              |
| Atrial Flutter                     | 2 (20%)         | 0                    |
| Atrial Fibrillation                | 1 (10%)         | 3 (30%)              |
| Accelerated Junctional Rhythm      | 0               | 1 (10%)              |
| Prolonged R-R interval             | 2 (20%)         | 1 (10%)              |
| Atrioventricular Block             | 2 (20%)         | 2 (20%)              |
| Intraventricular Block             | 0               | 2 (20%)              |
| ST-segment elevation               | 2 (20%)         | 0                    |
| Myocardial ischemia                | 2 (20%)         | 0                    |

|                                                 |         |         |
|-------------------------------------------------|---------|---------|
| Myocardial infarction                           | 1 (10%) | 1 (10%) |
| Hypotension                                     | 2 (20%) | 3 (30%) |
| Angina                                          | 0       | 1 (10%) |
| Elevated blood pressure                         | 1 (10%) | 0       |
| Anemia                                          | 8 (80%) | 8 (80%) |
| Prolonged thrombin time                         | 2 (20%) | 1 (10%) |
| Prolonged Activated Partial Thromboplastin Time | 2 (20%) | 1 (10%) |
| Decreased platelet count                        | 1 (10%) | 3 (30%) |
| Decreased eGFR                                  | 1 (10%) | 2 (20%) |
| Increased creatinine                            | 0       | 3 (30%) |
| Increased urea                                  | 1 (10%) | 1 (10%) |
| Urea protein positive                           | 0       | 1 (10%) |
| Urine occult blood positive                     | 0       | 1 (10%) |
| Acute kidney injury                             | 0       | 1 (10%) |
| Renal insufficiency                             | 0       | 1 (10%) |
| Increased alanine aminotransferase              | 3 (30%) | 4 (40%) |
| Increased gamma-glutamyl transferase            | 0       | 1 (10%) |
| Increased alkaline phosphatase                  | 0       | 2 (20%) |
| Pleural Effusion                                | 2 (20%) | 3 (30%) |
| Pulmonary Nodule                                | 1 (10%) | 1 (10%) |
| Pneumonia                                       | 1 (10%) | 1 (10%) |
| COVID-19                                        | 2 (20%) | 0       |
| Urinary Tract Infection                         | 0       | 1 (10%) |
| Elevated Interferon-gamma                       | 0       | 1 (10%) |
| Decreased Thyroid-Stimulating Hormone           | 0       | 1 (10%) |
| Elevated Free Triiodothyronine                  | 0       | 1 (10%) |
| Hypothyroidism                                  | 0       | 1 (10%) |

|                |         |         |
|----------------|---------|---------|
| Constipation   | 1 (10%) | 1 (10%) |
| Fracture       | 0       | 1 (10%) |
| Cholelithiasis | 1 (10%) | 0       |
| Hyperchloremia | 1 (10%) | 1 (10%) |
| Nasal bleeding | 0       | 1 (10%) |

Numbers represent n (%).

**Table S5. Incidence of *De novo* PRA and DSA in Cell therapy group.**

| Time      | Patients (n) | PRA-positive, n | DSA-positive, n |
|-----------|--------------|-----------------|-----------------|
| Baseline  | 10           | 0               | 0               |
| 1 month   | 10           | 0               | 4               |
| 6 months  | 9            | 3               | 8               |
| 12 months | 9            | 0               | 4               |

PRA: panel reactive antibody; DSA: donor-specific antibody; All patients had confirmed baseline PRA and DSA negativity.

**Table S6. Baseline and Changes in Echocardiographic Parameters at 6 and 12 Months**

|                   | Control              | Cell therapy         |
|-------------------|----------------------|----------------------|
| <b>Baseline</b>   |                      |                      |
| Participants (n)  | 10                   | 10                   |
| <b>LVEF</b>       |                      |                      |
| Mean $\pm$ SD (%) | 36.16 $\pm$ 3.86     | 37.80 $\pm$ 4.78     |
| Median (%) -IQR   | 37.00 (34.45, 39.00) | 38.50 (32.00, 41.25) |
| <b>6 months</b>   |                      |                      |
| Participants (n)  | 8                    | 9                    |
| <b>LVEF</b>       |                      |                      |
| Mean $\pm$ SD (%) | 41.30 $\pm$ 4.42     | 41.89 $\pm$ 5.44     |
| Median (%) -IQR   | 41.00 (40.00, 43.00) | 42.00 (36.50, 46.00) |
| <b>12 months</b>  |                      |                      |
| Participants (n)  | 7                    | 9                    |
| <b>LVEF</b>       |                      |                      |
| Mean $\pm$ SD (%) | 41.57 $\pm$ 4.19     | 42.55 $\pm$ 5.68     |
| Median (%) -IQR   | 41.50 (38.00, 44.00) | 42.00 (38.50, 46.00) |

Numbers represent mean  $\pm$  SD and median (IQR). LVEF: left ventricular ejection fraction.



**Table S7. Baseline and Changes in Cardiac MRI Parameters at 12 Months**

|                      | Control              | Cell therapy         |
|----------------------|----------------------|----------------------|
| <b>Baseline</b>      |                      |                      |
| Participants (n)     | 10                   | 10                   |
| <b>LVEF</b>          |                      |                      |
| Mean $\pm$ SD (%)    | 28.00 $\pm$ 8.83     | 27.50 $\pm$ 4.09     |
| Median (%) -IQR      | 30.00 (23.75, 33.25) | 28.00 (24.00, 30.25) |
| <b>Stroke volume</b> |                      |                      |
| Mean $\pm$ SD (ml)   | 41.07 $\pm$ 7.07     | 33.79 $\pm$ 13.42    |
| Median (ml) -IQR     | 41.60 (39.85, 44.68) | 34.35 (25.13, 45.15) |
| <b>12 months</b>     |                      |                      |
| Participants (n)     | 7                    | 9                    |
| <b>LVEF</b>          |                      |                      |
| Mean $\pm$ SD (%)    | 29.29 $\pm$ 9.41     | 29.22 $\pm$ 16.03    |
| Median (%) -IQR      | 32.00 (26.00, 36.00) | 25.00 (16.50, 39.00) |
| <b>Stroke volume</b> |                      |                      |
| Mean $\pm$ SD (ml)   | 34.09 $\pm$ 8.74     | 40.73 $\pm$ 16.62    |
| Median (ml) -IQR     | 34.20 (26.10, 40.10) | 38.70 (26.10, 56.75) |

Numbers represent mean  $\pm$  SD and median (IQR). LVEF: left ventricular ejection fraction.

**Figure S1**

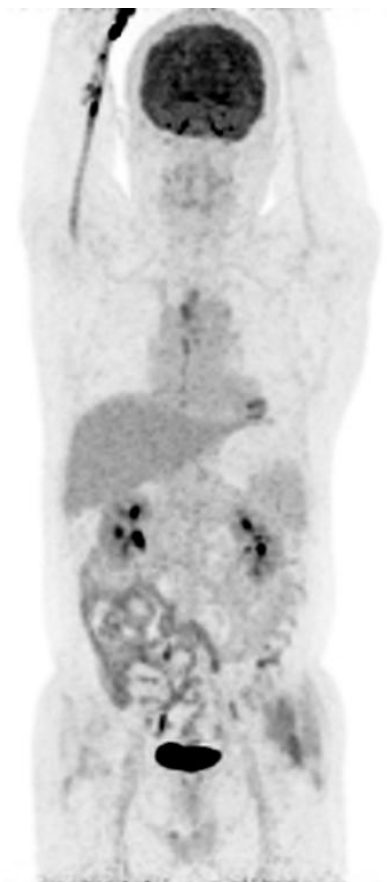

**Figure S1 Representative image of  $^{18}\text{F}$ -FDG-PET at 12 months after hiPSC-CMs treatment in Cell therapy group.**

**Figure S2.**

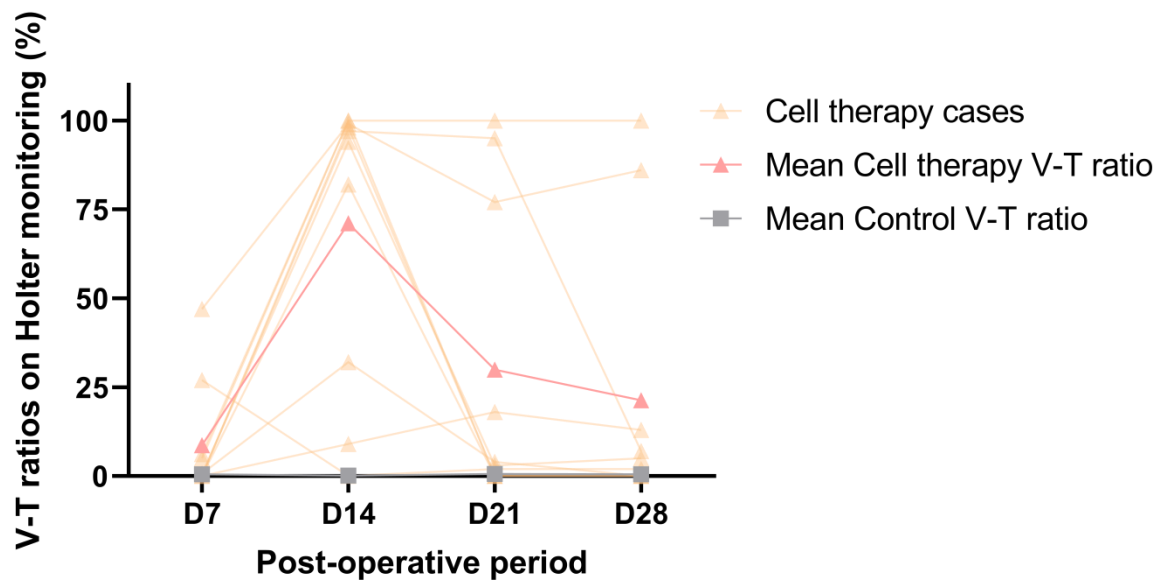

**Figure S2. Temporal evolution of ventricular arrhythmia burden post-procedure.**

Holter-monitored Premature ventricular-to-total beat ratio (V-T ratio, %) at postoperative day 7, 14, 21 and 28 post-procedure.

**Figure S3.**

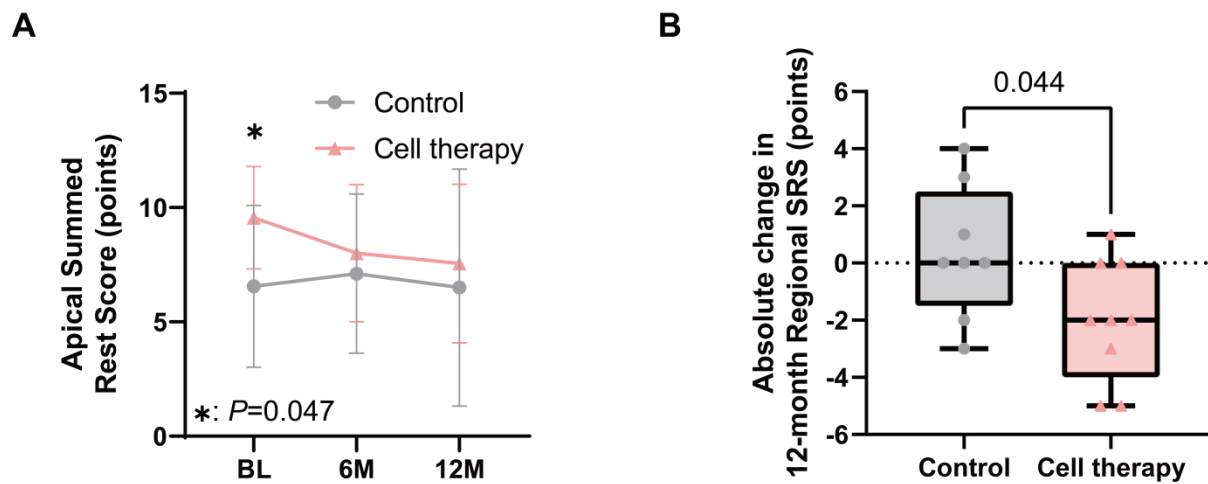

**Figure S3. Quantitative analysis of Apical summed rest score.**

(A) Longitudinal change in Apical Summed Rest Score (SRS) from baseline to 12-month follow-up as detected by  $^{99m}\text{Tc}$  SPECT-CT. (B) 12-month absolute change in apical SRS. The apical region was defined as apical anterior (13), apical septal (14) and apex (17) segments according to the 17-segment myocardial model. Differences between groups (two-tailed Student's *t*-test) are numerically annotated in the corresponding panels.
